# Supplementary material for: Using single cell sequencing data to model the evolutionary history of a tumor
Source: PubMed Central journal article supplement (PMC3903814; doi:10.1186/1471-2105-15-27), 2014-01-24
Supplement: 1471-2105-15-27-S1.pdf [file 1471-2105-15-27-S1.pdf]

# Supplementary Information of “Using Single Cell Sequencing Data to Model the Evolutionary History of a Tumor”

Kyung In Kim and Richard Simon

November 11, 2013

## 1 Stability of mutation tree of the 18 sites

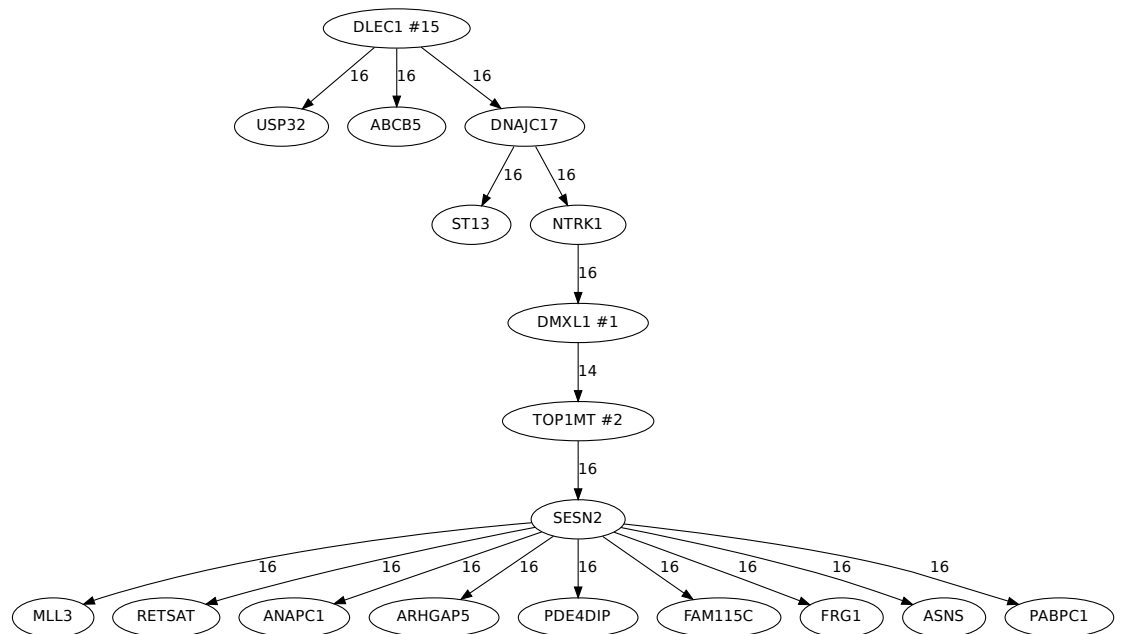

Figure S1: Summary of the site leave-one-out replication for the 18 sites. Each tree was based on 17 sites, one site omitted from the 18 sites sequentially. The frequencies of root site and branches of the site leave-one-out tree in the original tree are presented. For example, DLEC1 was found as root in 15 trees and DMXL1 was found as root in 1 trees and TOP1MT was found as root in 2 trees. Branches in the original tree were also found frequently in the 18 trees and the minimum frequency of branch in the original tree was 14.

## 2 Posterior probabilities of pairwise order relations for the 18 sites

Table S1: Posterior probabilities of pairwise order relations for the 18 sites.

| site $x$ | site $y$ | $x \rightarrow y$ | $x \leftarrow y$ | $x \not\leftrightarrow y$ |
|----------|----------|-------------------|------------------|---------------------------|
| PDE4DIP  | NTRK1    | 0.018892          | 0.981108         | 0                         |
| PDE4DIP  | SESN2    | 9.9e-05           | 0.999901         | 0                         |
| PDE4DIP  | ARHGAP5  | 0.499022          | 0.499038         | 0.00194                   |
| PDE4DIP  | DNAJC17  | 0.000371          | 0.999629         | 0                         |
| PDE4DIP  | USP32    | 0.981107          | 0.018893         | 0                         |
| PDE4DIP  | ANAPC1   | 0.932969          | 0.067031         | 0                         |
| PDE4DIP  | RETSAT   | 0.980556          | 0.018883         | 0.000561                  |
| PDE4DIP  | ST13     | 0.005135          | 0.994865         | 0                         |
| PDE4DIP  | DLEC1    | 0.018892          | 0.981108         | 0                         |
| PDE4DIP  | FRG1     | 0.997664          | 0.00138          | 0.000956                  |
| PDE4DIP  | DMXL1    | 0.067026          | 0.932974         | 0                         |
| PDE4DIP  | FAM115C  | 0.932965          | 0.067029         | 7e-06                     |
| PDE4DIP  | MLL3     | 0.578722          | 0.002987         | 0.418291                  |
| PDE4DIP  | ABCB5    | 0.211371          | 0.788629         | 0                         |
| PDE4DIP  | ASNS     | 0.784308          | 0.210225         | 0.005466                  |
| PDE4DIP  | PABPC1   | 0.149453          | 0.000771         | 0.849776                  |
| PDE4DIP  | TOP1MT   | 0.000371          | 0.999629         | 0                         |
| NTRK1    | SESN2    | 0.001382          | 0.998618         | 0                         |
| NTRK1    | ARHGAP5  | 0.981108          | 0.018892         | 0                         |
| NTRK1    | DNAJC17  | 0.000371          | 0.999629         | 0                         |
| NTRK1    | USP32    | 0.999993          | 7e-06            | 0                         |
| NTRK1    | ANAPC1   | 0.981108          | 0.018892         | 0                         |
| NTRK1    | RETSAT   | 0.999629          | 0.000371         | 0                         |
| NTRK1    | ST13     | 0.788644          | 0.211356         | 0                         |
| NTRK1    | DLEC1    | 0.067026          | 0.932974         | 0                         |
| NTRK1    | FRG1     | 1                 | 0                | 0                         |
| NTRK1    | DMXL1    | 0.932967          | 0.067033         | 0                         |
| NTRK1    | FAM115C  | 0.932965          | 0.067029         | 7e-06                     |
| NTRK1    | MLL3     | 0.999901          | 9.9e-05          | 0                         |
| NTRK1    | ABCB5    | 0.981107          | 0.018893         | 0                         |
| NTRK1    | ASNS     | 0.999973          | 2.7e-05          | 0                         |
| NTRK1    | PABPC1   | 0.999989          | 7e-06            | 3e-06                     |
| NTRK1    | TOP1MT   | 0.005135          | 0.994865         | 0                         |
| SESN2    | ARHGAP5  | 1                 | 0                | 0                         |
| SESN2    | DNAJC17  | 0.067031          | 0.932969         | 0                         |
| SESN2    | USP32    | 0.999629          | 0.000371         | 0                         |
| SESN2    | ANAPC1   | 0.999998          | 2e-06            | 0                         |
| SESN2    | RETSAT   | 1                 | 0                | 0                         |
| SESN2    | ST13     | 0.994866          | 0.005134         | 0                         |
| SESN2    | DLEC1    | 0.211371          | 0.788629         | 0                         |
| SESN2    | FRG1     | 1                 | 0                | 0                         |

Table S1

| site $x$ | site $y$ | $x \rightarrow y$ | $x \leftarrow y$ | $x \not\leftrightarrow y$ |
|----------|----------|-------------------|------------------|---------------------------|
| SESN2    | DMXL1    | 0.499988          | 0.500012         | 0                         |
| SESN2    | FAM115C  | 0.932974          | 0.067026         | 0                         |
| SESN2    | MLL3     | 1                 | 0                | 0                         |
| SESN2    | ABCB5    | 0.788614          | 0.211386         | 0                         |
| SESN2    | ASNS     | 1                 | 0                | 0                         |
| SESN2    | PABPC1   | 1                 | 0                | 0                         |
| SESN2    | TOP1MT   | 0.067027          | 0.932973         | 0                         |
| ARHGAP5  | DNAJC17  | 7e-06             | 0.999993         | 0                         |
| ARHGAP5  | USP32    | 0.99445           | 0.005133         | 0.000417                  |
| ARHGAP5  | ANAPC1   | 0.211385          | 0.788615         | 0                         |
| ARHGAP5  | RETSAT   | 0.981107          | 0.018893         | 0                         |
| ARHGAP5  | ST13     | 0.000371          | 0.999629         | 0                         |
| ARHGAP5  | DLEC1    | 9.9e-05           | 0.999901         | 0                         |
| ARHGAP5  | FRG1     | 0.000262          | 0                | 0.999737                  |
| ARHGAP5  | DMXL1    | 0.001382          | 0.998618         | 0                         |
| ARHGAP5  | FAM115C  | 0.003607          | 0.050203         | 0.94619                   |
| ARHGAP5  | MLL3     | 0.994736          | 0.005134         | 0.00013                   |
| ARHGAP5  | ABCB5    | 0.067027          | 0.932973         | 0                         |
| ARHGAP5  | ASNS     | 0.932973          | 0.067027         | 0                         |
| ARHGAP5  | PABPC1   | 0.999838          | 9.9e-05          | 6.3e-05                   |
| ARHGAP5  | TOP1MT   | 0.000371          | 0.999629         | 0                         |
| DNAJC17  | USP32    | 0.999901          | 9.9e-05          | 0                         |
| DNAJC17  | ANAPC1   | 0.999993          | 7e-06            | 0                         |
| DNAJC17  | RETSAT   | 0.999999          | 1e-06            | 0                         |
| DNAJC17  | ST13     | 0.999629          | 0.000371         | 0                         |
| DNAJC17  | DLEC1    | 0.018891          | 0.981109         | 0                         |
| DNAJC17  | FRG1     | 1                 | 0                | 0                         |
| DNAJC17  | DMXL1    | 0.78861           | 0.21139          | 0                         |
| DNAJC17  | FAM115C  | 0.932973          | 0.067027         | 0                         |
| DNAJC17  | MLL3     | 0.999999          | 1e-06            | 0                         |
| DNAJC17  | ABCB5    | 0.788615          | 0.211385         | 0                         |
| DNAJC17  | ASNS     | 1                 | 0                | 0                         |
| DNAJC17  | PABPC1   | 1                 | 0                | 0                         |
| DNAJC17  | TOP1MT   | 0.211375          | 0.788625         | 0                         |
| USP32    | ANAPC1   | 0.499992          | 0.500008         | 0                         |
| USP32    | RETSAT   | 0.497166          | 0.497166         | 0.005669                  |
| USP32    | ST13     | 9.9e-05           | 0.999901         | 0                         |
| USP32    | DLEC1    | 7e-06             | 0.999993         | 0                         |
| USP32    | FRG1     | 0.981106          | 0.018893         | 0                         |
| USP32    | DMXL1    | 0.005135          | 0.994865         | 0                         |
| USP32    | FAM115C  | 0.788615          | 0.211385         | 0                         |
| USP32    | MLL3     | 0.73977           | 0.198287         | 0.061943                  |
| USP32    | ABCB5    | 0.001382          | 0.998618         | 0                         |
| USP32    | ASNS     | 0.932903          | 0.067024         | 7.3e-05                   |
| USP32    | PABPC1   | 1e-05             | 0                | 0.99999                   |
| USP32    | TOP1MT   | 0.001381          | 0.998619         | 0                         |
| ANAPC1   | RETSAT   | 0.999629          | 0.000371         | 0                         |

Table S1

| site $x$ | site $y$ | $x \rightarrow y$ | $x \leftarrow y$ | $x \not\leftrightarrow y$ |
|----------|----------|-------------------|------------------|---------------------------|
| ANAPC1   | ST13     | 9.9e-05           | 0.999901         | 0                         |
| ANAPC1   | DLEC1    | 0.001381          | 0.998619         | 0                         |
| ANAPC1   | FRG1     | 0.549926          | 0.039508         | 0.410565                  |
| ANAPC1   | DMXL1    | 0.067026          | 0.932974         | 0                         |
| ANAPC1   | FAM115C  | 0.118776          | 0.443143         | 0.438082                  |
| ANAPC1   | MLL3     | 0.980448          | 0.01888          | 0.000672                  |
| ANAPC1   | ABCB5    | 0.000371          | 0.999629         | 0                         |
| ANAPC1   | ASNS     | 0.932939          | 0.067027         | 3.4e-05                   |
| ANAPC1   | PABPC1   | 0.111167          | 1.1e-05          | 0.888822                  |
| ANAPC1   | TOP1MT   | 9.9e-05           | 0.999901         | 0                         |
| RETSAT   | ST13     | 2e-06             | 0.999998         | 0                         |
| RETSAT   | DLEC1    | 2.7e-05           | 0.999973         | 0                         |
| RETSAT   | FRG1     | 0.000111          | 8e-06            | 0.999881                  |
| RETSAT   | DMXL1    | 2.7e-05           | 0.999973         | 0                         |
| RETSAT   | FAM115C  | 0.208083          | 0.776318         | 0.015598                  |
| RETSAT   | MLL3     | 0.065852          | 0.916589         | 0.017559                  |
| RETSAT   | ABCB5    | 0.005135          | 0.994865         | 0                         |
| RETSAT   | ASNS     | 0.003709          | 0.718481         | 0.27781                   |
| RETSAT   | PABPC1   | 3e-06             | 0                | 0.999997                  |
| RETSAT   | TOP1MT   | 9.9e-05           | 0.999901         | 0                         |
| ST13     | DLEC1    | 0.211361          | 0.788639         | 0                         |
| ST13     | FRG1     | 1                 | 0                | 0                         |
| ST13     | DMXL1    | 0.788595          | 0.211405         | 0                         |
| ST13     | FAM115C  | 0.499993          | 0.500007         | 0                         |
| ST13     | MLL3     | 0.999998          | 2e-06            | 0                         |
| ST13     | ABCB5    | 0.49998           | 0.50002          | 0                         |
| ST13     | ASNS     | 0.999901          | 9.9e-05          | 0                         |
| ST13     | PABPC1   | 0.999994          | 0                | 6e-06                     |
| ST13     | TOP1MT   | 0.01889           | 0.98111          | 0                         |
| DLEC1    | FRG1     | 1                 | 0                | 0                         |
| DLEC1    | DMXL1    | 0.211381          | 0.788619         | 0                         |
| DLEC1    | FAM115C  | 0.929712          | 0.066791         | 0.003497                  |
| DLEC1    | MLL3     | 0.999973          | 2.7e-05          | 0                         |
| DLEC1    | ABCB5    | 0.994865          | 0.005135         | 0                         |
| DLEC1    | ASNS     | 0.999998          | 2e-06            | 0                         |
| DLEC1    | PABPC1   | 1                 | 0                | 0                         |
| DLEC1    | TOP1MT   | 0.500008          | 0.499992         | 0                         |
| FRG1     | DMXL1    | 7e-06             | 0.999989         | 4e-06                     |
| FRG1     | FAM115C  | 0.210357          | 0.784802         | 0.004841                  |
| FRG1     | MLL3     | 0                 | 0                | 1                         |
| FRG1     | ABCB5    | 0                 | 1                | 0                         |
| FRG1     | ASNS     | 0                 | 0                | 1                         |
| FRG1     | PABPC1   | 0                 | 0                | 1                         |
| FRG1     | TOP1MT   | 2e-06             | 0.999998         | 0                         |
| DMXL1    | FAM115C  | 0.211385          | 0.788615         | 0                         |
| DMXL1    | MLL3     | 0.999901          | 9.9e-05          | 0                         |
| DMXL1    | ABCB5    | 0.788626          | 0.211374         | 0                         |

Table S1

| site $x$ | site $y$ | $x \rightarrow y$ | $x \leftarrow y$ | $x \not\leftrightarrow y$ |
|----------|----------|-------------------|------------------|---------------------------|
| DMXL1    | ASNS     | 0.999629          | 0.000371         | 0                         |
| DMXL1    | PABPC1   | 0.999865          | 0                | 0.000135                  |
| DMXL1    | TOP1MT   | 0.788615          | 0.211385         | 0                         |
| FAM115C  | MLL3     | 0.00844           | 0.000606         | 0.990954                  |
| FAM115C  | ABCB5    | 0.067029          | 0.932971         | 0                         |
| FAM115C  | ASNS     | 0.500007          | 0.499993         | 0                         |
| FAM115C  | PABPC1   | 0.156302          | 0.00301          | 0.840688                  |
| FAM115C  | TOP1MT   | 0.211381          | 0.788619         | 0                         |
| MLL3     | ABCB5    | 2e-06             | 0.999998         | 0                         |
| MLL3     | ASNS     | 0.018893          | 0.981104         | 3e-06                     |
| MLL3     | PABPC1   | 0.000128          | 1e-06            | 0.999872                  |
| MLL3     | TOP1MT   | 2.7e-05           | 0.999973         | 0                         |
| ABCB5    | ASNS     | 0.999993          | 7e-06            | 0                         |
| ABCB5    | PABPC1   | 0.999999          | 1e-06            | 0                         |
| ABCB5    | TOP1MT   | 0.067027          | 0.932973         | 0                         |
| ASNS     | PABPC1   | 0                 | 0                | 1                         |
| ASNS     | TOP1MT   | 0.000371          | 0.999629         | 0                         |
| PABPC1   | TOP1MT   | 1e-06             | 0.999999         | 0                         |

### 3 Optimized time to the MRCA under varying population growth rate

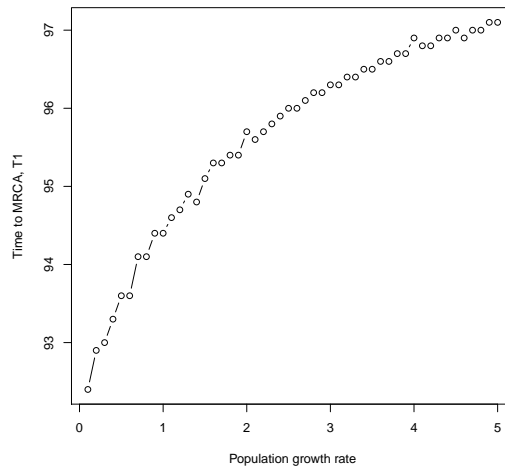

Figure S2: Optimization of the tuning parameter  $\alpha$  under varying population growth rate.  $x$ -axis represents varying population growth rates and  $y$ -axis represents the optimized proportion of time to the MRCA over the total time,  $\alpha$ . Population size is assumed to increase with a constant rate from the MRCA of the sample. Under the constant population size (population growth rate = 0), the optimized  $\alpha$  is 0.92. The optimized  $\alpha$  appears to increase as the fixed population growth rate increases.

#### 4 Prior probabilities under varying population growth rate

Table S2: Prior probabilities,  $\Pr(x \rightarrow y)$  and  $\Pr(x \nrightarrow y)$  for given population growth rate.  $\Pr(x \leftarrow y)$  is same as  $\Pr(x \rightarrow y)$ .

| population growth rate | $\Pr(x \rightarrow y)$ | $\Pr(x \nrightarrow y)$ |
|------------------------|------------------------|-------------------------|
| 0.1                    | 0.46452                | 0.07095                 |
| 0.2                    | 0.46495                | 0.07011                 |
| 0.3                    | 0.46481                | 0.07038                 |
| 0.4                    | 0.46471                | 0.07058                 |
| 0.5                    | 0.46515                | 0.06970                 |
| 0.6                    | 0.46447                | 0.07107                 |
| 0.7                    | 0.46544                | 0.06912                 |
| 0.8                    | 0.46520                | 0.06960                 |
| 0.9                    | 0.46496                | 0.07009                 |
| 1.0                    | 0.46452                | 0.07097                 |
| 1.1                    | 0.46458                | 0.07084                 |
| 1.2                    | 0.46528                | 0.06943                 |
| 1.3                    | 0.46465                | 0.07069                 |
| 1.4                    | 0.46406                | 0.07188                 |
| 1.5                    | 0.46546                | 0.06908                 |
| 1.6                    | 0.46492                | 0.07016                 |
| 1.7                    | 0.46512                | 0.06975                 |
| 1.8                    | 0.46448                | 0.07104                 |
| 1.9                    | 0.46442                | 0.07116                 |
| 2.0                    | 0.46510                | 0.06980                 |
| 2.1                    | 0.46457                | 0.07087                 |
| 2.2                    | 0.46505                | 0.06991                 |
| 2.3                    | 0.46429                | 0.07141                 |
| 2.4                    | 0.46492                | 0.07017                 |
| 2.5                    | 0.46591                | 0.06817                 |
| 2.6                    | 0.46537                | 0.06926                 |
| 2.7                    | 0.46542                | 0.06917                 |
| 2.8                    | 0.46561                | 0.06878                 |
| 2.9                    | 0.46470                | 0.07061                 |
| 3.0                    | 0.46398                | 0.07204                 |
| 3.1                    | 0.46409                | 0.07182                 |
| 3.2                    | 0.46513                | 0.06974                 |
| 3.3                    | 0.46491                | 0.07019                 |
| 3.4                    | 0.46495                | 0.07009                 |
| 3.5                    | 0.46464                | 0.07072                 |
| 3.6                    | 0.46465                | 0.07070                 |
| 3.7                    | 0.46457                | 0.07087                 |
| 3.8                    | 0.46501                | 0.06999                 |
| 3.9                    | 0.46530                | 0.06941                 |
| 4.0                    | 0.46669                | 0.06661                 |
| 4.1                    | 0.46545                | 0.06911                 |
| 4.2                    | 0.46415                | 0.07170                 |
| 4.3                    | 0.46555                | 0.06890                 |
| 4.4                    | 0.46520                | 0.06961                 |
| 4.5                    | 0.46513                | 0.06974                 |
| 4.6                    | 0.46415                | 0.07170                 |
| 4.7                    | 0.46559                | 0.06882                 |
| 4.8                    | 0.46422                | 0.07156                 |
| 4.9                    | 8 0.46580              | 0.06839                 |
| 5.0                    | 0.46462                | 0.07076                 |



Table S3: Prior probabilities,  $\Pr((0,0)|x \rightarrow y)$ ,  $\Pr((1,0)|x \rightarrow y)$  and  $\Pr((1,1)|x \rightarrow y)$  for given population growth rate.  $\Pr((0,1)|x \rightarrow y) = 0$ . For the relation  $x \leftarrow y$ ,  $\Pr((0,0)|x \leftarrow y) = \Pr((0,0)|x \rightarrow y)$ ,  $\Pr((0,1)|x \leftarrow y) = \Pr((1,0)|x \rightarrow y)$ ,  $\Pr((1,0)|x \leftarrow y) = \Pr((0,1)|x \rightarrow y) = 0$ , and  $\Pr((1,1)|x \leftarrow y) = \Pr((1,1)|x \rightarrow y)$ .

| population growth rate | $\Pr((0,0) x \rightarrow y)$ | $\Pr((1,0) x \rightarrow y)$ | $\Pr((1,1) x \rightarrow y)$ |
|------------------------|------------------------------|------------------------------|------------------------------|
| 0.1                    | 0.01710                      | 0.36741                      | 0.61549                      |
| 0.2                    | 0.01660                      | 0.36723                      | 0.61616                      |
| 0.3                    | 0.01709                      | 0.36717                      | 0.61575                      |
| 0.4                    | 0.01674                      | 0.36633                      | 0.61693                      |
| 0.5                    | 0.01676                      | 0.36588                      | 0.61735                      |
| 0.6                    | 0.01729                      | 0.36818                      | 0.61453                      |
| 0.7                    | 0.01644                      | 0.36403                      | 0.61954                      |
| 0.8                    | 0.01694                      | 0.36483                      | 0.61822                      |
| 0.9                    | 0.01647                      | 0.36558                      | 0.61795                      |
| 1.0                    | 0.01707                      | 0.36774                      | 0.61518                      |
| 1.1                    | 0.01682                      | 0.36739                      | 0.61579                      |
| 1.2                    | 0.01669                      | 0.36463                      | 0.61869                      |
| 1.3                    | 0.01677                      | 0.36809                      | 0.61514                      |
| 1.4                    | 0.01723                      | 0.36880                      | 0.61397                      |
| 1.5                    | 0.01668                      | 0.36492                      | 0.61841                      |
| 1.6                    | 0.01661                      | 0.36769                      | 0.61570                      |
| 1.7                    | 0.01671                      | 0.36679                      | 0.61650                      |
| 1.8                    | 0.01662                      | 0.36733                      | 0.61606                      |
| 1.9                    | 0.01719                      | 0.36708                      | 0.61573                      |
| 2.0                    | 0.01631                      | 0.36739                      | 0.61630                      |
| 2.1                    | 0.01694                      | 0.36721                      | 0.61585                      |
| 2.2                    | 0.01687                      | 0.36560                      | 0.61753                      |
| 2.3                    | 0.01679                      | 0.36932                      | 0.61389                      |
| 2.4                    | 0.01671                      | 0.36713                      | 0.61616                      |
| 2.5                    | 0.01622                      | 0.36185                      | 0.62193                      |
| 2.6                    | 0.01643                      | 0.36407                      | 0.61950                      |
| 2.7                    | 0.01642                      | 0.36457                      | 0.61901                      |
| 2.8                    | 0.01613                      | 0.36352                      | 0.62035                      |
| 2.9                    | 0.01673                      | 0.36689                      | 0.61638                      |
| 3.0                    | 0.01658                      | 0.37029                      | 0.61313                      |
| 3.1                    | 0.01666                      | 0.36929                      | 0.61405                      |
| 3.2                    | 0.01638                      | 0.36585                      | 0.61777                      |
| 3.3                    | 0.01655                      | 0.36601                      | 0.61744                      |
| 3.4                    | 0.01632                      | 0.36564                      | 0.61804                      |
| 3.5                    | 0.01671                      | 0.36710                      | 0.61619                      |
| 3.6                    | 0.01653                      | 0.36747                      | 0.61600                      |
| 3.7                    | 0.01661                      | 0.36793                      | 0.61546                      |
| 3.8                    | 0.01618                      | 0.36680                      | 0.61702                      |
| 3.9                    | 0.01619                      | 0.36279                      | 0.62101                      |
| 4.0                    | 0.01553                      | 0.36018                      | 0.62429                      |
| 4.1                    | 0.01608                      | 0.36287                      | 0.62105                      |
| 4.2                    | 0.01657                      | 0.36915                      | 0.61428                      |
| 4.3                    | 0.01609                      | 0.36456                      | 0.61935                      |
| 4.4                    | 0.01643                      | 0.36588                      | 0.61769                      |
| 4.5                    | 0.01589                      | 0.36543                      | 0.61868                      |
| 4.6                    | 0.01697                      | 0.37046                      | 0.61257                      |
| 4.7                    | 0.01635                      | 0.36421                      | 0.61944                      |
| 4.8                    | 0.01679                      | 0.36838                      | 0.61483                      |
| 4.9                    | 0.01608                      | 0.36347                      | 0.62045                      |
| 5.0                    | 0.01644                      | 0.36804                      | 0.61552                      |

Table S4: Prior probabilities,  $\Pr((0,0)|x \not\sim y)$ ,  $\Pr((1,0)|x \not\sim y)$  for given population growth rate.  $\Pr((1,1)|x \not\sim y) = 0$  and  $\Pr((0,1)|x \not\sim y) = \Pr((1,0)|x \not\sim y)$ .

| population growth rate | $\Pr((0,0) x \not\sim y)$ | $\Pr((1,0) x \not\sim y)$ |
|------------------------|---------------------------|---------------------------|
| 0.1                    | 0.71860                   | 0.14070                   |
| 0.2                    | 0.72326                   | 0.13837                   |
| 0.3                    | 0.71825                   | 0.14087                   |
| 0.4                    | 0.72074                   | 0.13963                   |
| 0.5                    | 0.71840                   | 0.14080                   |
| 0.6                    | 0.71535                   | 0.14232                   |
| 0.7                    | 0.72101                   | 0.13950                   |
| 0.8                    | 0.71763                   | 0.14118                   |
| 0.9                    | 0.72282                   | 0.13859                   |
| 1.0                    | 0.72071                   | 0.13964                   |
| 1.1                    | 0.72033                   | 0.13983                   |
| 1.2                    | 0.71690                   | 0.14155                   |
| 1.3                    | 0.72133                   | 0.13933                   |
| 1.4                    | 0.71767                   | 0.14116                   |
| 1.5                    | 0.71695                   | 0.14153                   |
| 1.6                    | 0.72500                   | 0.13750                   |
| 1.7                    | 0.72197                   | 0.13901                   |
| 1.8                    | 0.72570                   | 0.13715                   |
| 1.9                    | 0.71812                   | 0.14094                   |
| 2.0                    | 0.72632                   | 0.13684                   |
| 2.1                    | 0.72068                   | 0.13966                   |
| 2.2                    | 0.72049                   | 0.13976                   |
| 2.3                    | 0.72274                   | 0.13863                   |
| 2.4                    | 0.72434                   | 0.13783                   |
| 2.5                    | 0.72076                   | 0.13962                   |
| 2.6                    | 0.71979                   | 0.14011                   |
| 2.7                    | 0.72178                   | 0.13911                   |
| 2.8                    | 0.72418                   | 0.13791                   |
| 2.9                    | 0.72191                   | 0.13905                   |
| 3.0                    | 0.72564                   | 0.13718                   |
| 3.1                    | 0.72764                   | 0.13618                   |
| 3.2                    | 0.72513                   | 0.13744                   |
| 3.3                    | 0.72460                   | 0.13770                   |
| 3.4                    | 0.72546                   | 0.13727                   |
| 3.5                    | 0.72482                   | 0.13759                   |
| 3.6                    | 0.72594                   | 0.13703                   |
| 3.7                    | 0.72528                   | 0.13736                   |
| 3.8                    | 0.72663                   | 0.13668                   |
| 3.9                    | 0.72640                   | 0.13680                   |
| 4.0                    | 0.72666                   | 0.13667                   |
| 4.1                    | 0.72441                   | 0.13780                   |
| 4.2                    | 0.72865                   | 0.13568                   |
| 4.3                    | 0.72687                   | 0.13657                   |
| 4.4                    | 0.72509                   | 0.13746                   |
| 4.5                    | 0.72841                   | 0.13579                   |
| 4.6                    | 0.72341                   | 0.13829                   |
| 4.7                    | 0.72125                   | 0.13938                   |
| 4.8                    | 0.72730                   | 0.13635                   |
| 4.9                    | 0.72314                   | 0.13843                   |
| 5.0                    | 0.72477                   | 0.13762                   |
